# Supplementary material for: Visualization of actin filaments and monomers in somatic cell nuclei
Source: PubMed Central journal article supplement — Mol Biol Cell. 2013 Apr 1;24(7):982–94. doi: 10.1091/mbc.E12-09-0685 (PMC3608506; doi:10.1091/mbc.e12-09-0685), 2013-04-01
Supplement: supp_E12-09-0685_CombinedSupMats.pdf [file supp_E12-09-0685_CombinedSupMats.pdf]

## Supplemental Material

**Movie S1.** Utr230-EN dynamics in a live U2OS cell.

**Movie S2.** Utr230-mEos2-NLS before and after photoconversion by 405 laser in a live U2OS cell. Scale bar = 10  $\mu\text{m}$ .

**Table S1.** Residue ranges for actin binding domains selected as candidate nuclear actin reporters.

**Figure S1.** Localization of candidate nuclear actin reporters in transiently transfected U2OS cells: (a) NLS-EGFP-ezrin ERM, (b) alpha-actinin CH1CH2-EN, (c) VASP GAB-EN, (d) JMY WH2b-EN, (e) NLS-EGFP-talin ERM, (f) NLS-EGFP-ABLIM3 headpiece, (g) cortactin FABD-EN, (h) NLS-EGFP-Abl1 FABD, (i-j) Lifeact-EN, (k-l) NLS-EGFP-vinculin FABD.

**Figure S2.** (a) U2OS cells treated with LatB concentrations between 0.2 and 0.8  $\mu\text{M}$  in medium for 30 minutes at 37°C. (b) U2OS cells stably expressing Utr230-EN treated with cytochalasin D concentrations between 0.2 and 1  $\mu\text{M}$  in medium for 30 minutes at 37°C. Cells were fixed and stained with Alexa Fluor 568-phalloidin and DAPI.

**Figure S3.** Immunofluorescence in U2OS cells stably expressing Utr230-EN and stained with antibodies for (a) nuclear lamina marker lamin B1, (b) nuclear matrix marker NuMa, (c) nucleoli marker fibrillarin, (d) nuclear speckle marker SC35, (e) PML body marker PML, (f) nuclear matrix marker matrin, (g) nucleoplasm marker hnRNP, (h) small nuclear ribonucleoprotein snRNP, (i) BAF chromatin remodeling complex marker Brg1, (j) SWR1 chromatin remodeling marker p400, (k) telomere marker Rap1 and (l) non-randomly distributed histone H2AZ.

**Figure S4.** BrdU integrated nuclear intensity distribution in U2OS cells: (a) untransfected, n=103; (b) stably expressing EN at high or moderate levels, n=119; (c) stably expressing Utr230-EN at high or moderate levels, n=108. (d) EU average integrated nuclear intensity in U2OS cells: untransfected (n=311) and stably expressing Utr230-EN at high or moderate levels (n=327). Both BrdU and EU intensity values were normalized by nuclear area.

**Figure S5.** (a) Length distribution of 10000 nuclear actin filaments, pooled from 109 cells. (b) Nuclear actin filament intensity distributions in three representative cells. (c) Double logarithmic plot of MSD versus time, with average values for all nuclear actin trajectories (red) and for a simulated random walk with a diffusion coefficient 0.07  $\mu\text{m}^2/\text{s}$  (blue). N=25000 particles for both observed and simulated data. (d) Distribution of particle trajectory lengths for all tracked nuclear actin particles. N=25000 particles.

| Domain               | NCBI gi   | Organism      | Residues | References                |
|----------------------|-----------|---------------|----------|---------------------------|
| VASP GABD            | 66804927  | Dictyostelium | 195-224  | Hansen et al., 2010       |
| JMY WH2b             | 120659968 | Human         | 521-542  | Zuchero et al., 2009      |
| MAL RPEL1            | 20521918  | Human         | 119-150  | Mouilleron et al., 2008   |
| MAL RPEL2            | 20521918  | Human         | 163-194  | Mouilleron et al., 2008   |
| ezrin ERM            | 46249758  | Human         | 490-586  | Saleh et al., 2008        |
| talin ERM            | 55859707  | Human         | 90-400   | Gingras et al., 2008      |
| alpha-actinin CH1CH2 | 114793788 | Human         | 1-228    | Borrego-Diaz et al., 2006 |
| dystrophin CH1CH2    | 33874355  | Human         | 1-246    | Norwood et al., 2000      |
| utrophin CH1CH2      | 110611228 | Human         | 1-261    | Keep et al., 1999         |
| Abl1 FABD            | 78070527  | Human         | 264-396  | Hantschel et al., 2005    |
| cortactin FABD       | 21707902  | Human         | 80-288   | Shvetsov et al., 2009     |
| vinculin FABD        | 228505    | Human         | 106-293  | Janssen et al., 2006      |
| ABLIM3 HP            | 40788381  | Human         | 652-691  | PDB 1UJS (unpublished)    |
| Lifeact              | 341940078 | Synthetic     | 1-20     | Riedl et al., 2008        |

**Table S1.**

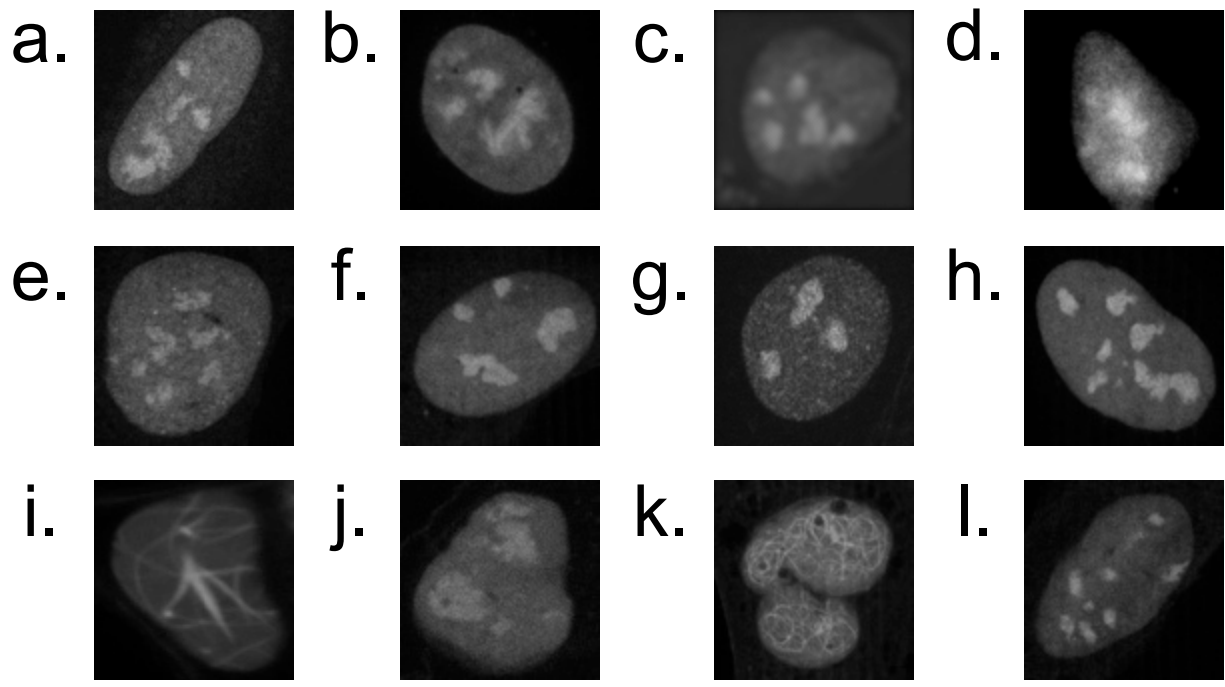

**Figure S1.**

a.

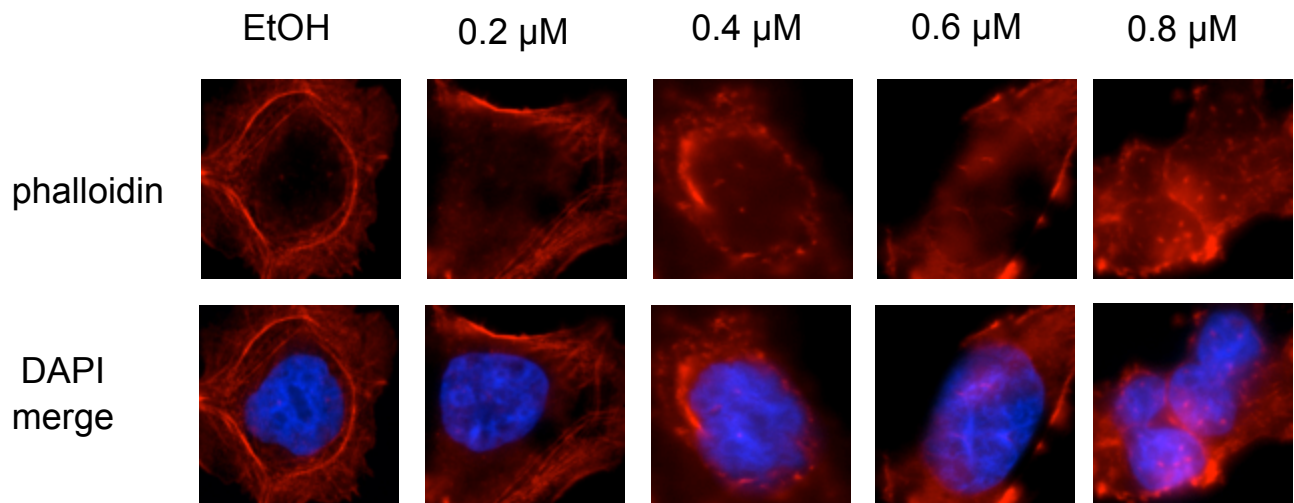

b.

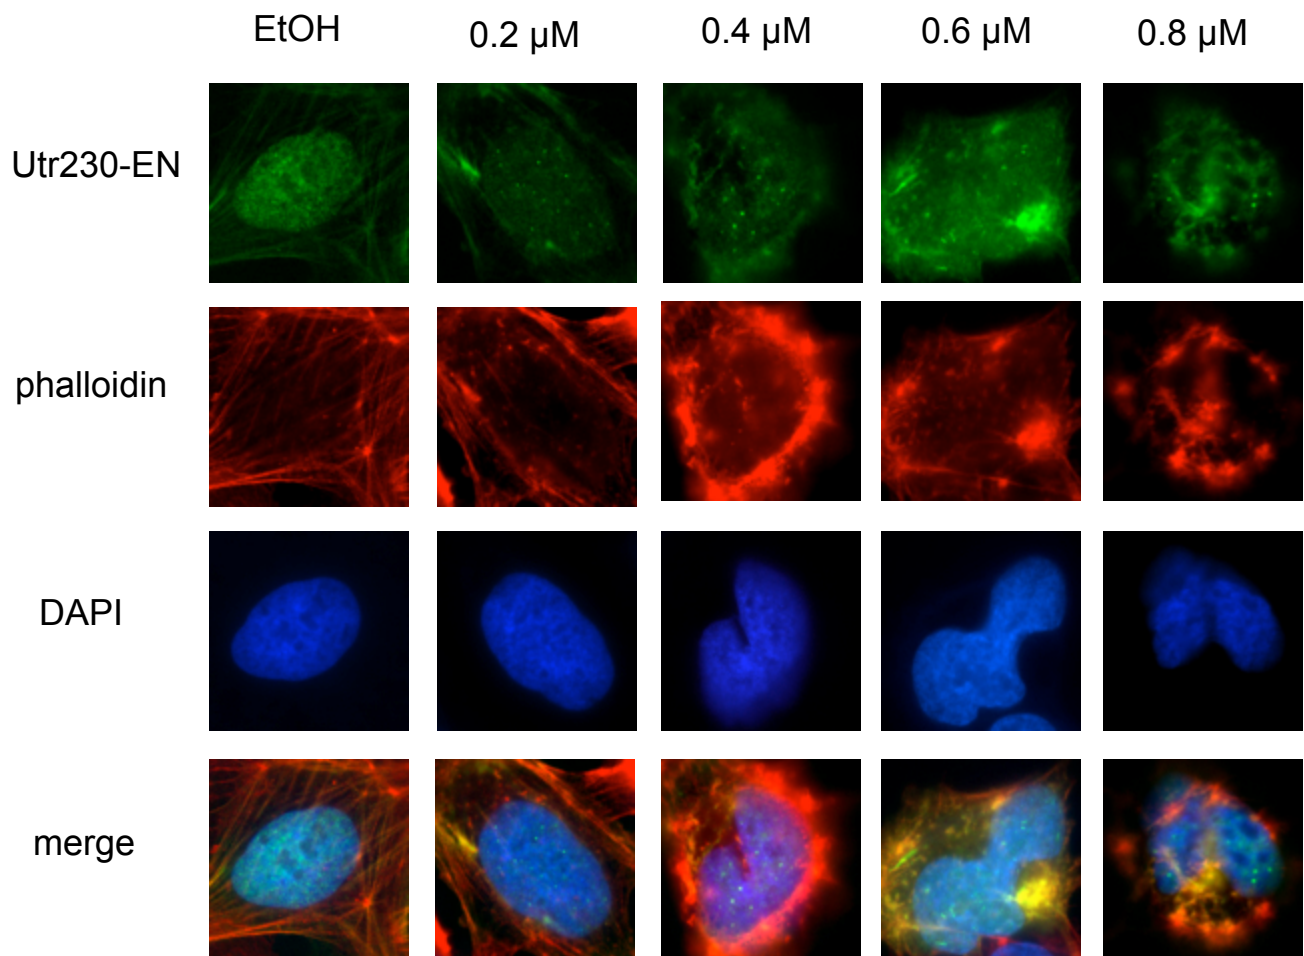

Figure S2.

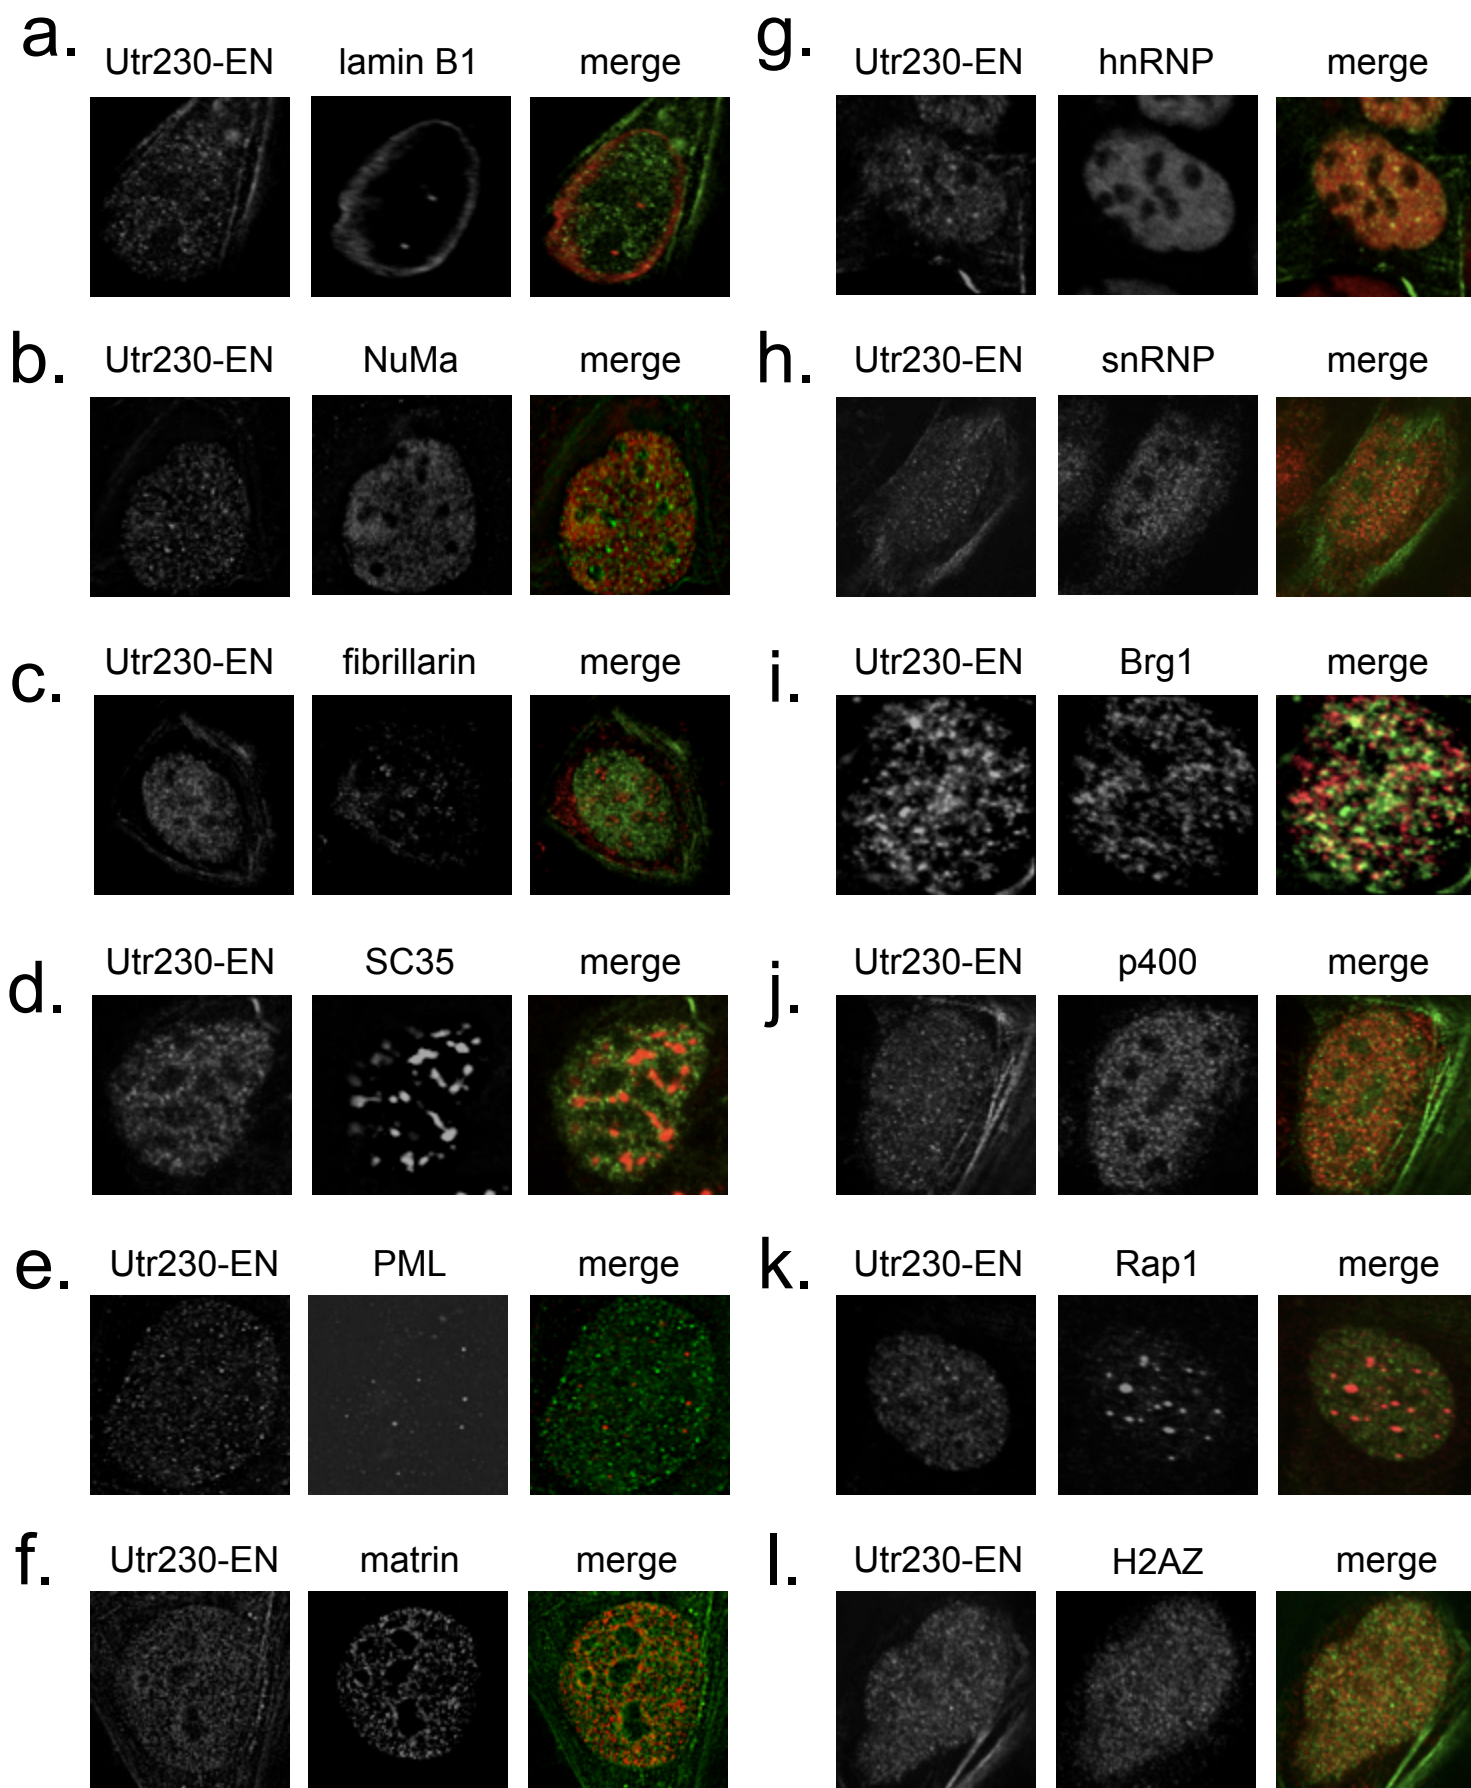

**Figure S3.**

**a.**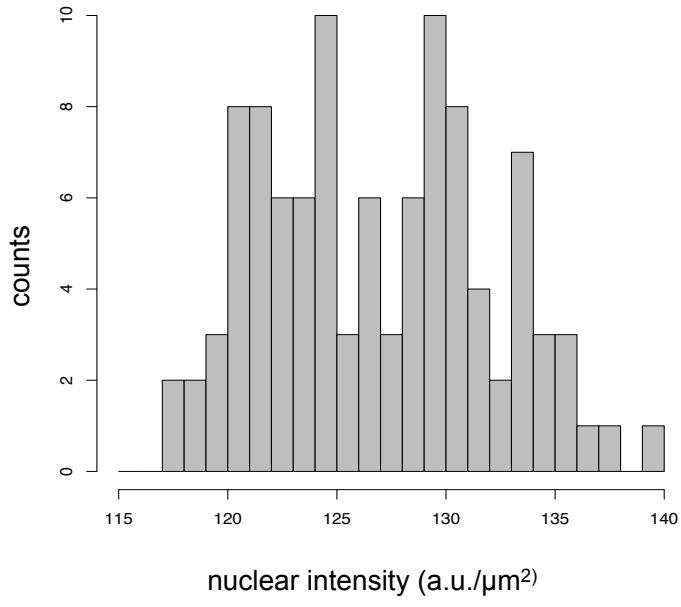**b.**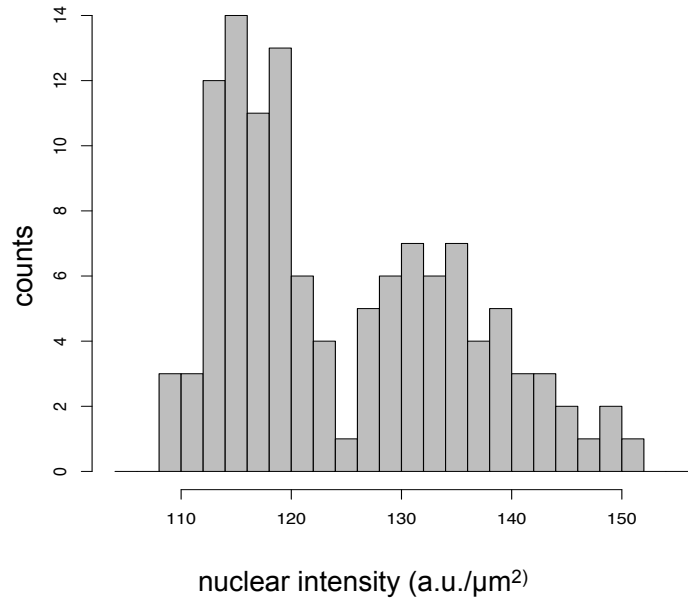**c.**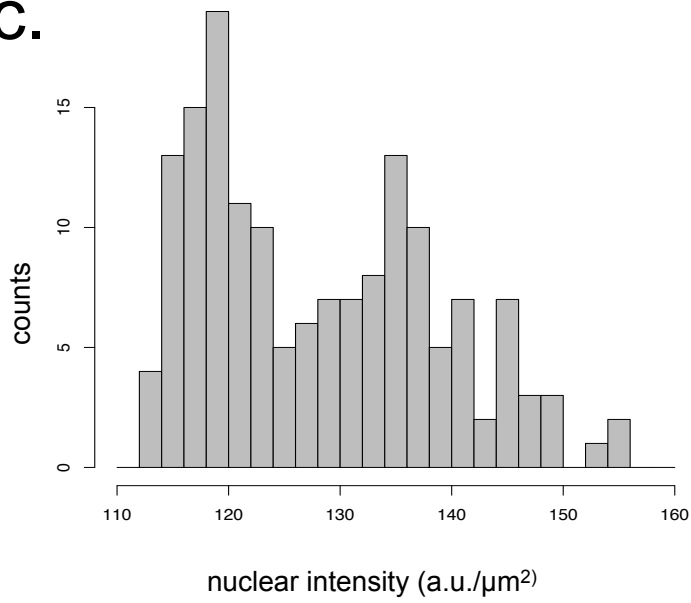**d.**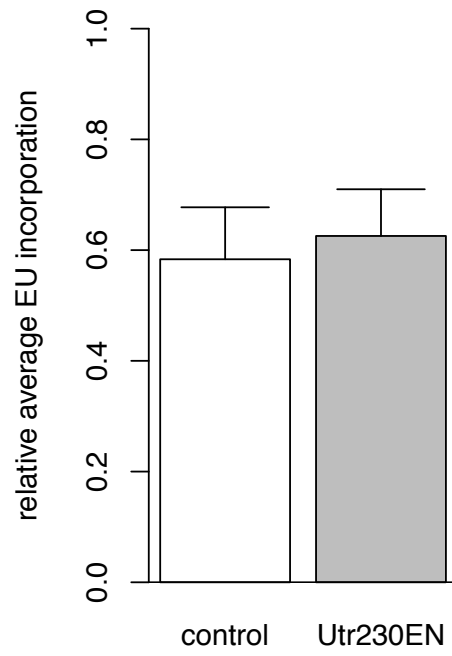**Figure S4.**

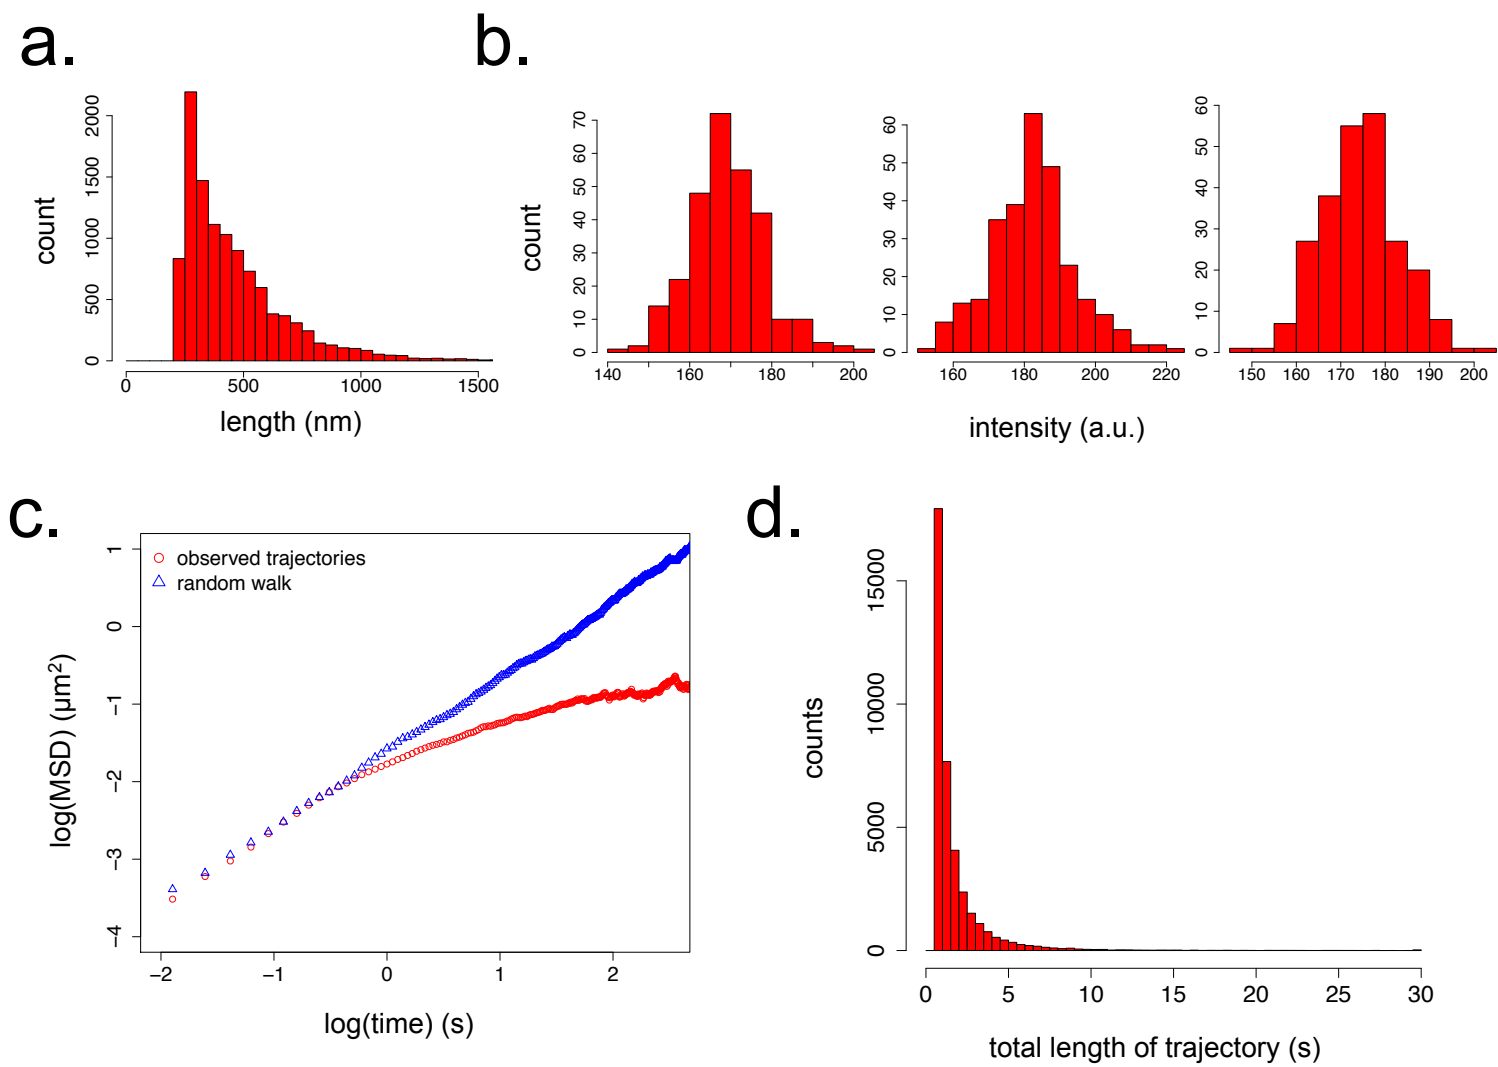

**Figure S5.**
